# Supplementary material for: HIV-Related Arterial Stiffness in Malawian Adults Is Associated With the Proportion of PD-1–Expressing CD8+ T Cells and Reverses With Antiretroviral Therapy
Source: J Infect Dis. 2019 Jan 9;219(12):1948–58. doi: 10.1093/infdis/jiz015 (PMC6534190; doi:10.1093/infdis/jiz015)
Supplement: jiz015_suppl_Supplementary_Material [file jiz015_suppl_supplementary_material.pdf]

## Supplementary Material

### Supplementary Figure 1A. T cell gating strategy

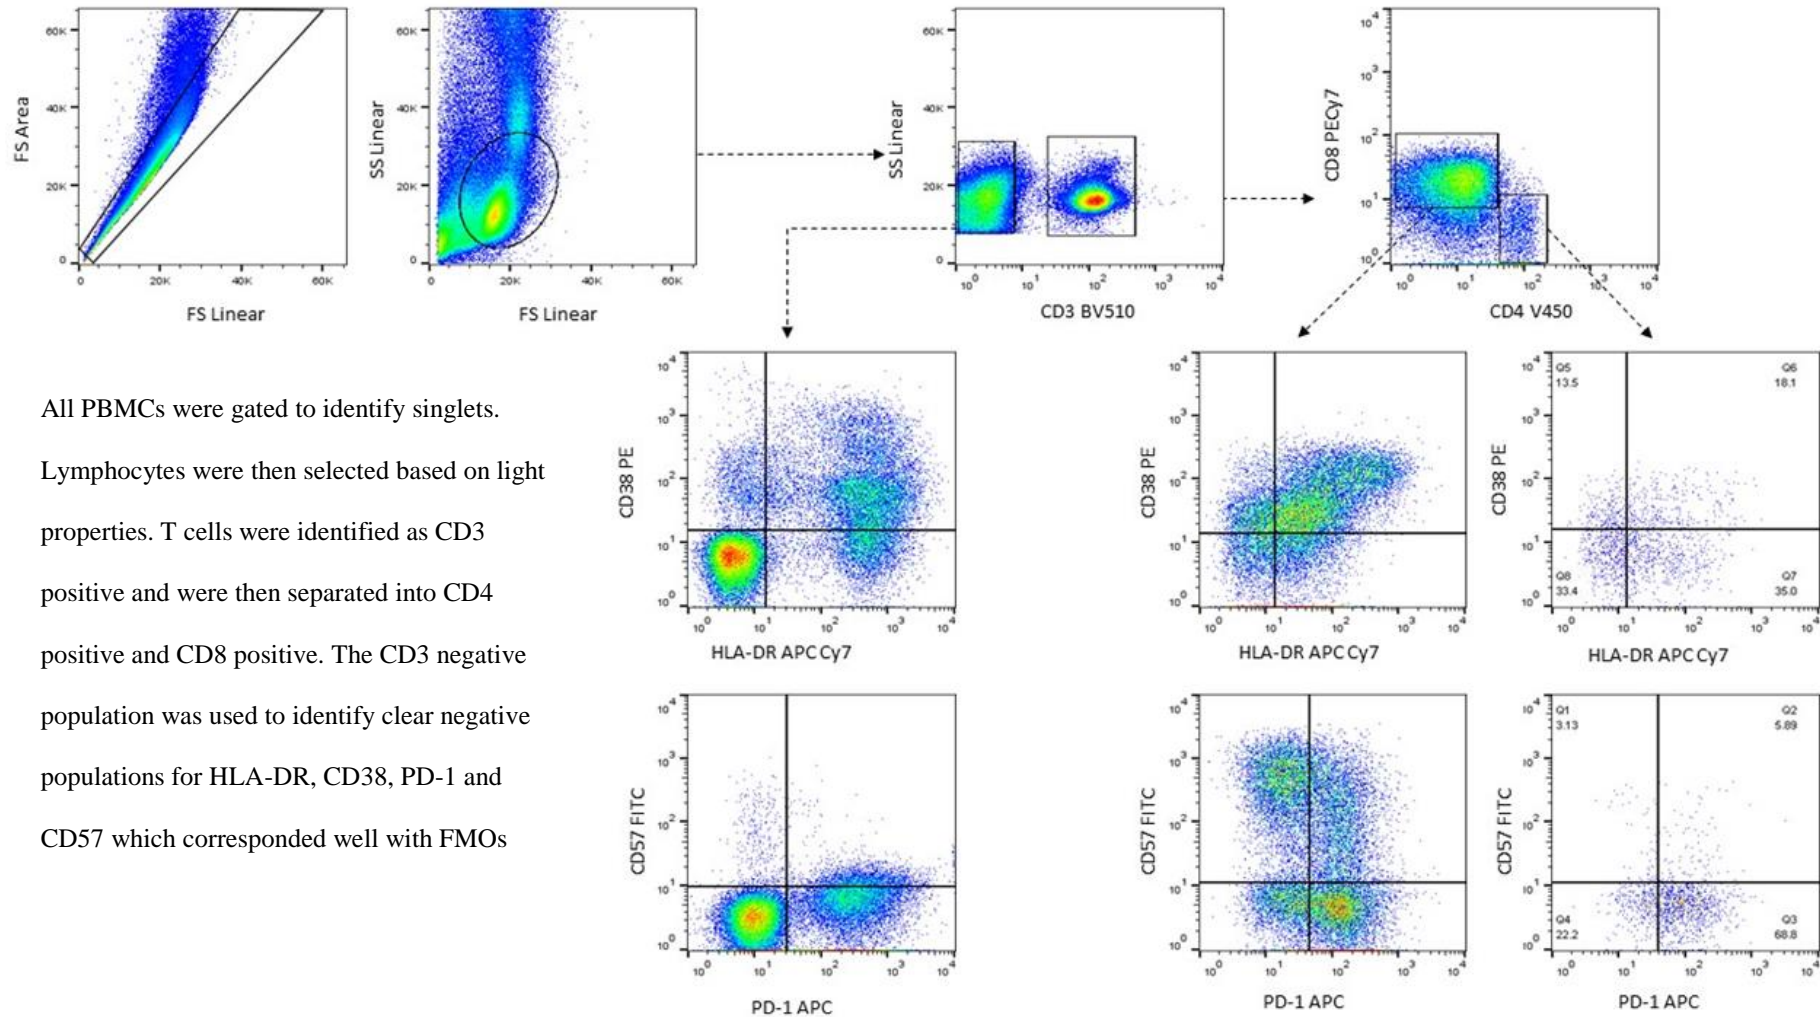

Supplementary Figure 1B. Monocyte gating strategy

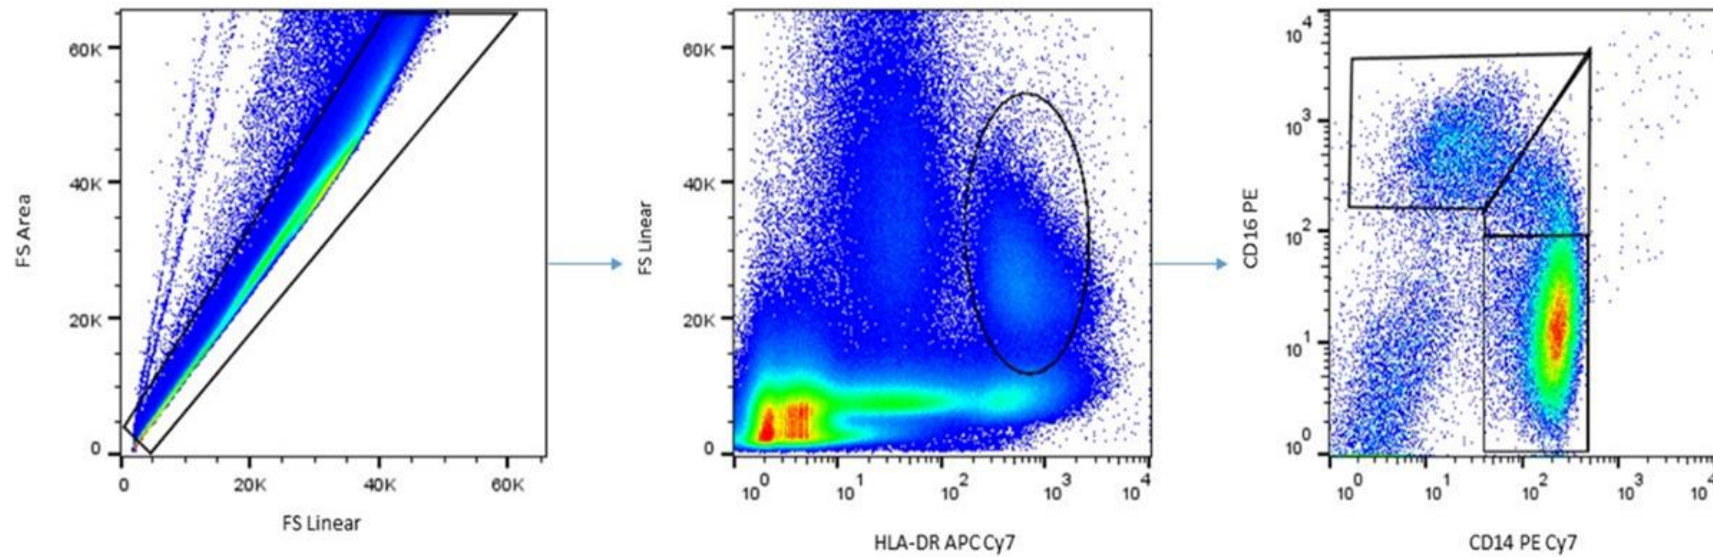

All PBMCs were gated to identify singlets. Monocytes were identified based on HLA-DR expression and size. Monocyte subsets were gated according to previously published guidance [Passlick et al. **Blood**. 1989]

Supplementary Material Figure 2. Direct Acyclic Graph for mediators of cfPWV

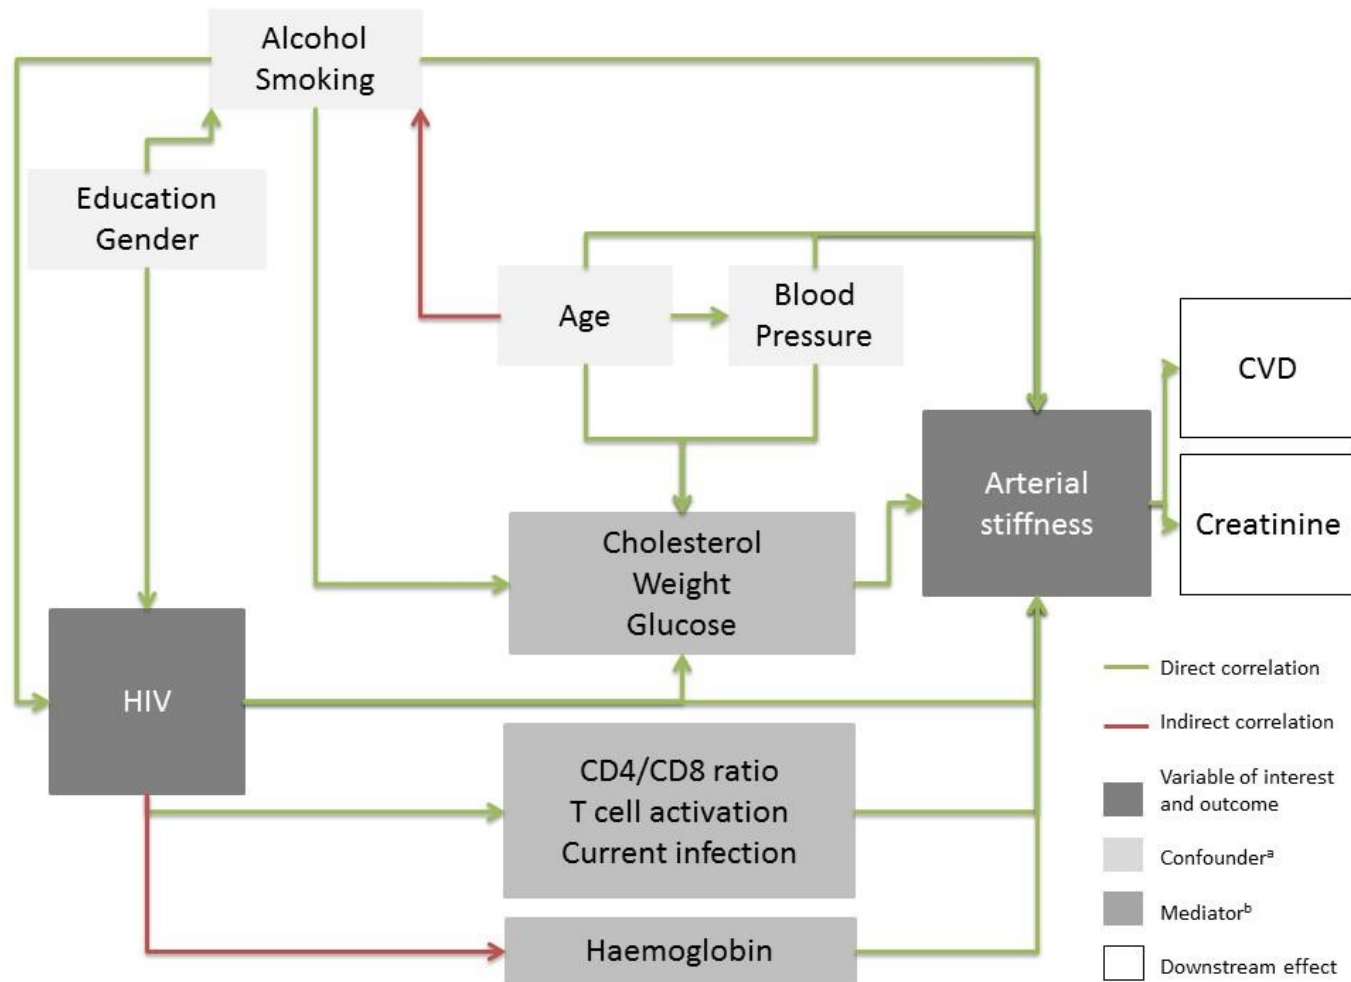

<sup>a</sup>A confounder was judged to be any variable which was associated with both HIV and arterial stiffness but was not judged *a priori* to lie on the mechanistic pathway between them. <sup>b</sup>A mediator was a variable that was judged *a priori* to lie on the mechanistic pathway between HIV and arterial stiffness.

Supplementary Material Figure 3. Absolute cfPWV values by age and HIV status

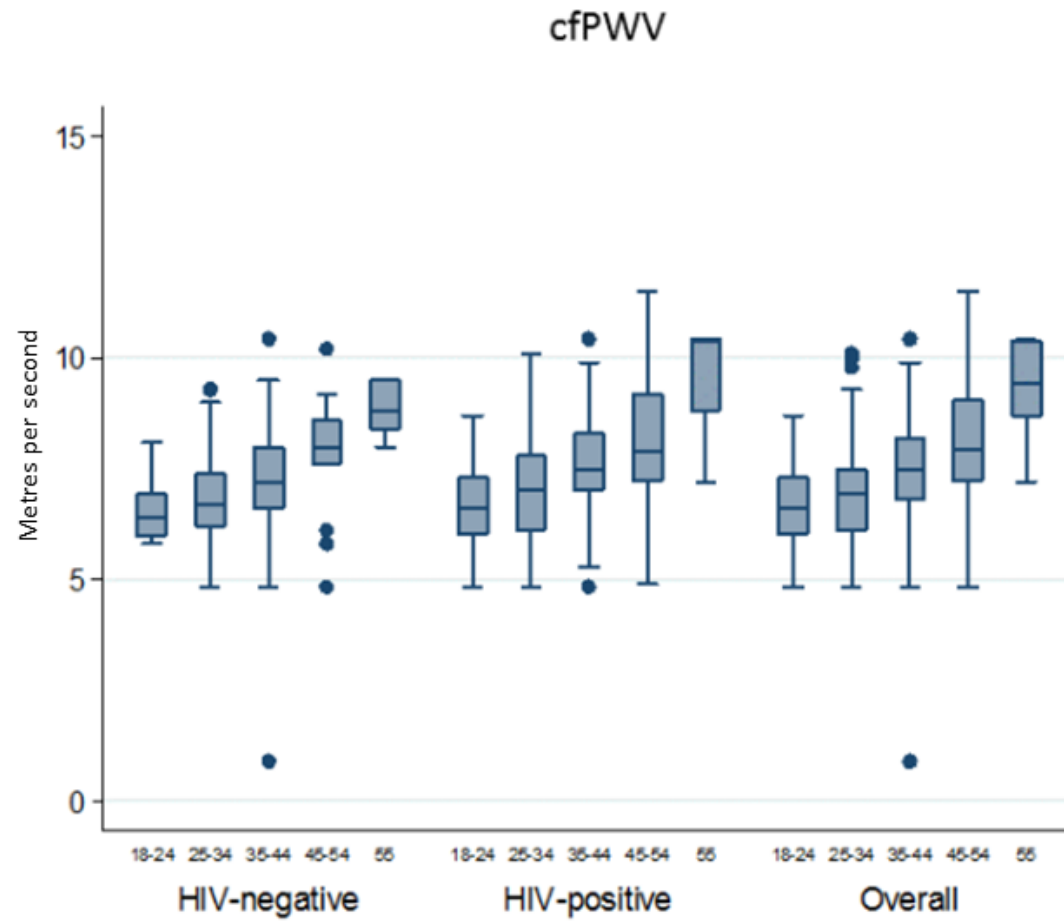

**Supplementary Material Table 1. Reasons screened but not recruited for HIV infected adults**

| Reason not recruited                                | Number screened but not recruited |
|-----------------------------------------------------|-----------------------------------|
| CD4 >100                                            | 1477                              |
| Declined                                            | 117                               |
| Died before enrolment visit                         | 42                                |
| Received ART from National Program before enrolment | 39                                |
| Not a Blantyre resident                             | 23                                |
| Laboratory Machine failure                          | 16                                |
| Lost                                                | 14                                |
| Recruited to another study                          | 12                                |
| Too unwell                                          | 9                                 |
| Pregnant                                            | 8                                 |
| Received ART from private system                    | 2                                 |
| Unknown                                             | 69                                |
| Total                                               | 1828                              |

Supplementary Material Table 2. Immune activation markers at enrolment and week 44 by HIV status

|                                     |               | Enrolment           |                            |                      | Week 44            |                      |
|-------------------------------------|---------------|---------------------|----------------------------|----------------------|--------------------|----------------------|
|                                     |               | HIV uninfected n=94 | HIV infected n=202         | p value <sup>a</sup> | HIV Infected n=190 | p value <sup>b</sup> |
| Absolute CD4 count (cells/ $\mu$ L) |               | NA                  | 42 (18 – 62)               | NA                   | 144 (99 – 219)     | NA                   |
| HIV viral load (copies/ml)          |               | NA                  | 113,560 (41,747 – 293,663) | NA                   | NA                 | NA                   |
| CD4 T cells                         | CD4/CD8 ratio | 1.39 (1.02 – 2.15)  | 0.09 (0.04 – 0.20)         | <0.00001             | 0.14 (0.06 – 0.23) | 0.007                |
|                                     | %CD4          | 58.1 (50.5 -68.3)   | 8.2 (4.1 – 16.5)           | <0.0001              | 8.11 (4.1 – 12.4)  | 0.89                 |
|                                     | CD4 Activated | 53.5 (40.5 - 65.0)  | 74.5 (61.5 – 85.7)         | <0.0001              | 60.7 (49.7 – 69.3) | <0.0001              |
|                                     | CD4 Exhausted | 15.0 (9.3 – 23.6)   | 54.0 (31.3 – 66.9)         | <0.0001              | 31.9 (21.9 – 48.1) | <0.0001              |
|                                     | CD4 Senescent | 6.7 (3.6 – 9.03)    | 14.8 (9.0- 23.9)           | <0.0001              | 14.7 (9.0 – 23.3)  | 0.99                 |
| CD8 T cells                         | %CD8          | 41.1 (31.7 – 50.0)  | 81.8 (83.5 – 95. 9)        | <0.0001              | 60.4 (54.3 – 67.0) | <0.0001              |
|                                     | CD8 Activated | 59.6 (39.8 – 72.7)  | 78.6 (64.5 – 87.6)         | <0.0001              | 75.3 (66.7 – 83.8) | 0.21                 |
|                                     | CD8 Exhausted | 20.9 (12.2 – 29.4)  | 37.7 (28.6 – 49.5)         | <0.0001              | 31.7 (20.6 – 47.4) | 0.007                |
|                                     | CD8 Senescent | 39.7 (26.5 – 53.4)  | 53.6 (43.9 – 64.1)         | <0.0001              | 61.0 (47.3 – 68.3) | 0.001                |
| Monocytes                           | Classical     | 75.4 (64.9 – 80.7)  | 75.5 (66.3 – 82.5)         | 0.79                 | 74.8 (67.1 – 80.7) | 0.90                 |
|                                     | Intermediate  | 9.4 (6.7 – 14.4)    | 9.9 (6.0 – 13.1)           | 0.99                 | 8.5 (6.0 – 12.7)   | 0.13                 |
|                                     | Non-classical | 13.1 (9.8 – 22.0)   | 13.6 (9.0 – 20.6)          | 0.59                 | 15.3 (10.9 – 21.3) | 0.07                 |

<sup>a</sup>Comparing HIV infected versus HIV uninfected participants at enrolment (2 weeks post ART initiation), Wilcoxon Ranksum. <sup>b</sup>Comparing HIV infected participants at enrolment to HIV infected participants at week 44, Paired Wilcoxon.



The REALITY trial group consists of:

Participating Centres: Joint Clinical Research Centre (JCRC), Kampala, Uganda (coordinating centre for Uganda): P Mugenyi, C Kityo, V Musiime, P Wavamunno, E Nambi, P Ocitti, M Ndigendawani. JCRC, Fort Portal, Uganda: S Kabahenda, M Kemigisa, J Acen, D Olebo, G Mpamize, A Amone, D Okweny, A Mbonye, F Nambaziira, A Rweyora, M Kangah and V Kabaswahili. JCRC, Gulu, Uganda: J Abach, G Abongomera, J Omongin, I Aciro, A Philliam, B Arach, E Ocung, G Amone, P Miles, C Adong, C Tumsuiime, P Kidega, B Otto, F Apio. JCRC, Mbale, Uganda: K Baleeta, A Mukuye, M Abwola, F Ssennono, D Baliruno, S Tuhirwe, R Namisi, F Kigongo, D Kikyonkyo, F Mushahara, D Okweny, J Tusiime, A Musiime, A Nankya, D Atwongyeire, S Sirikye, S Mula, N Noowe. JCRC, Mbarara, Uganda: A Lugemwa, M Kasozi, S Mwebe, L Atwine, T Senkindu, T Natuhurira, C Katemba, E Ninsiima, M Acaku J Kyomuhangi, R Ankunda, D Tukwasibwe, L Ayesiga. University of Zimbabwe Clinical Research Centre, Harare, Zimbabwe: J Hakim, K Nathoo, M Bwakura-Dangarembizi, A Reid, E Chidziva, T Mhute, GC Tinago, J Bhiri, S Mudzingwa, M Phiri, J Steamer, R Nhema, C Warambwa, G Musoro, S Mutsai, B Nemasango, C Moyo, S Chitongo, K Rashirai, S Vhembo, B Mlambo, S Nkomani, B Ndemera, M Willard, C Berejena, Y Musodza, P Matiza, B Mudenge, V Gutu. KEMRI Wellcome Trust Research Programme, Kilifi, Kenya: A Etyang, C Agutu, J Berkley, K Maitland, P Njuguna, S Mwaringa, T Etyang, K Awuondo, S Wale, J Shangala, J Kithunga, S Mwarumba, S Said Maitha, R Mutai, M Lozi Lewa, G Mwambingu, A Mwanzu, C Kalama, H Latham, J Shikuku, A Fondo, A Njogu, C Khadenge, B Mwakisha. Moi University Clinical Research Centre, Eldoret, Kenya: A Siika, K Wools-Kaloustian, W Nyandiko, P Cheruiyot, A Sudoi, S Wachira, B Meli, M Karoney, A Nzioka, M Tanui, M Mokaya, W Ekiru, C Mboya, D Mwimali, C Mengich, J Choge, W Injera, K Njenga, S Cherutich, M Anyango Orido, G Omondi Lwande, P Rutto, A Mudogo, I Kutto, A Shali, L Jaika, H Jerotich, M Pierre. Department of Medicine and Malawi-Liverpool Wellcome Trust Clinical Research Programme, College of Medicine, Blantyre, Malawi: J Mallewa, S Kaunda, J Van Oosterhout, B O'Hare, R Heyderman, C Gonzalez, N Dzabala, C Kelly, B Denis, G Selemani, L Nyondo Mipando, E Chirwa, P Banda, L Mvula, H Msuku,

M Ziwoya, Y Manda, S Nicholas, C Masesa, T Mwalukomo, L Makhaza, I Sheha, J Bwanali, M Limbuni.

Trial Coordination and Oversight: MRC Clinical Trials Unit at UCL, London, UK: D Gibb, M Thomason, AS Walker, S Pett, A Szubert, A Griffiths, H Wilkes, C Rajapakse, M Spyer, A Prendergast, N Klein. Data Management Systems: M Rauchenberger, N Van Looy, E Little, K Fairbrother.

Social Science Group: F Cowan, J Seeley, S Bernays, R Kawuma, Z Mupambireyi.

Independent REALITY Trial Monitors: F Kyomuhendo, S Nakalanzi, J Peshu, S Ndaa, J Chabuka, N Mkandawire, L Matandika, C Kapuya.

Trial Steering Committee: I Weller (Chair), E Malianga, C Mwansambo, F Miiro, P Elyanu, E Bukusi, E Katabira, O Mugurungi, D Gibb, J Hakim, A Etyang, P Mugenyi, J Mallewa.

Data Monitoring Committee: T Peto (Chair), P Musoke, J Matenga, S Phiri.

Endpoint Review Committee (independent members): H Lyall (Co-Chair), V Johnston (Co-Chair), F Fitzgerald, F Post, F Ssali, A Prendergast, A Arenas-Pinto, A Turkova, A Bamford.
